# Supplementary material for: The Emission Mechanism of Gold Nanoclusters Capped with 11-Mercaptoundecanoic Acid, and the Detection of Methanol in Adulterated Wine Model
Source: Materials (Basel). 2021 Oct 23;14(21):6342. doi: 10.3390/ma14216342 (PMC8585185; doi:10.3390/ma14216342)
Supplement: Supplementary file 1 [file materials-14-06342-s001.zip › materials-1408178-supplementary.pdf]

Supplementary Materials

# The Emission Mechanism of Gold Nanoclusters Capped with 11-Mercaptoundecanoic Acid, and the Detection of Methanol in Adulterated Wine Model

Ming Wei <sup>1</sup>, Ye Tian <sup>1</sup>, Lijun Wang <sup>1</sup>, Yuankai Hong <sup>1,\*</sup>, Dan Luo <sup>2,\*</sup> and Yinlin Sha <sup>1,\*</sup>

<sup>1</sup> Single-Molecule and Nanobiology Laboratory, Department of Biophysics, School of Basic Medical Sciences, Peking University, Beijing 100191, China; weiming@bjmu.edu.cn (M.W.); ye.tian1@ge.com (Y.T.); lijunwang@bjmu.edu.cn (L.W.)

<sup>2</sup> CAS Center for Excellence in Nanoscience, Beijing Key Laboratory of Micro-nano Energy and Sensor, Beijing Institute of Nanoenergy and Nanosystems, Chinese Academy of Sciences, Beijing 100083, China

\* Correspondence: ykhong@bjmu.edu.cn (Y.H.); luodan@binn.cas.cn (D.L.); shy1@hsc.pku.edu.cn (Y.S.)

**Citation:** Wei, M.; Tian, Y.; Wang, L.; Hong, Y.; Luo, D.; Sha, Y. The Emission Mechanism of Gold Nanoclusters Capped with 11-Mercaptoundecanoic Acid, and the Detection of Methanol in Adulterated Wine Model. *Materials* **2021**, *14*, 6342. <https://doi.org/10.3390/ma14216342>

Academic Editors: Mikhael Bechelany and Daniela Iannazzo

Received: 20 September 2021

Accepted: 20 October 2021

Published: 23 October 2021

**Publisher's Note:** MDPI stays neutral with regard to jurisdictional claims in published maps and institutional affiliations.

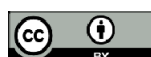

**Copyright:** © 2021 by the authors. Submitted for possible open access publication under the terms and conditions of the Creative Commons Attribution (CC BY) license (<http://creativecommons.org/licenses/by/4.0/>).

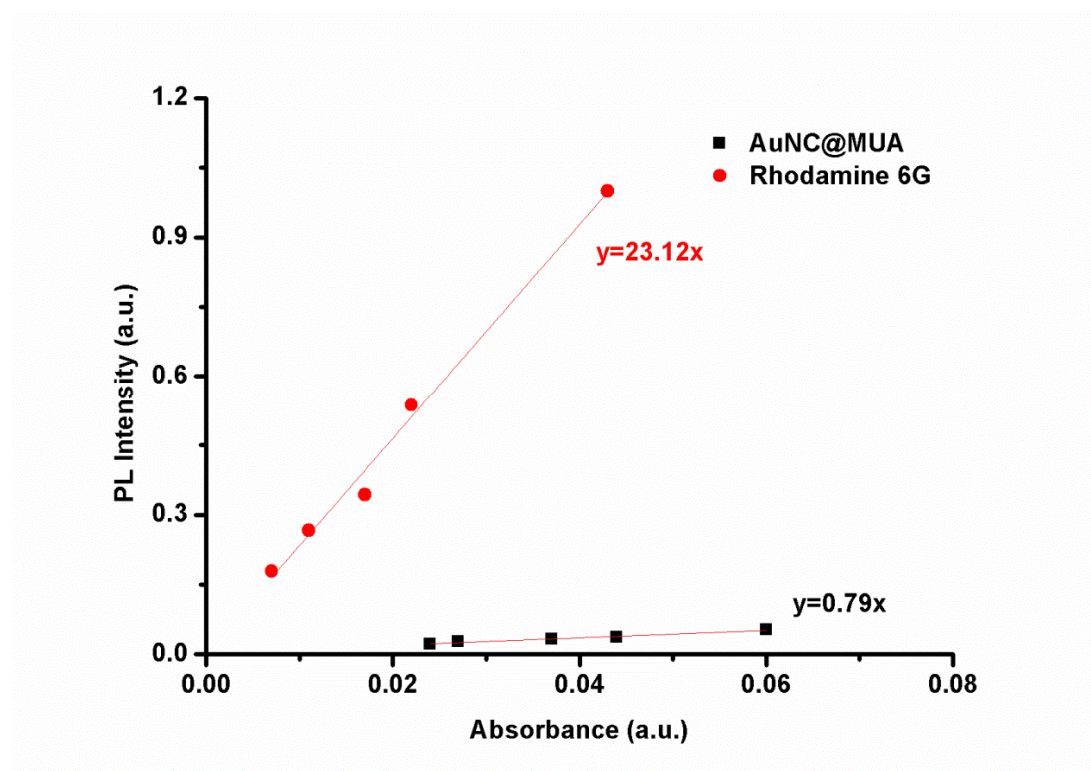

**Figure S1.** measurement of QY of AuNC@MUA.

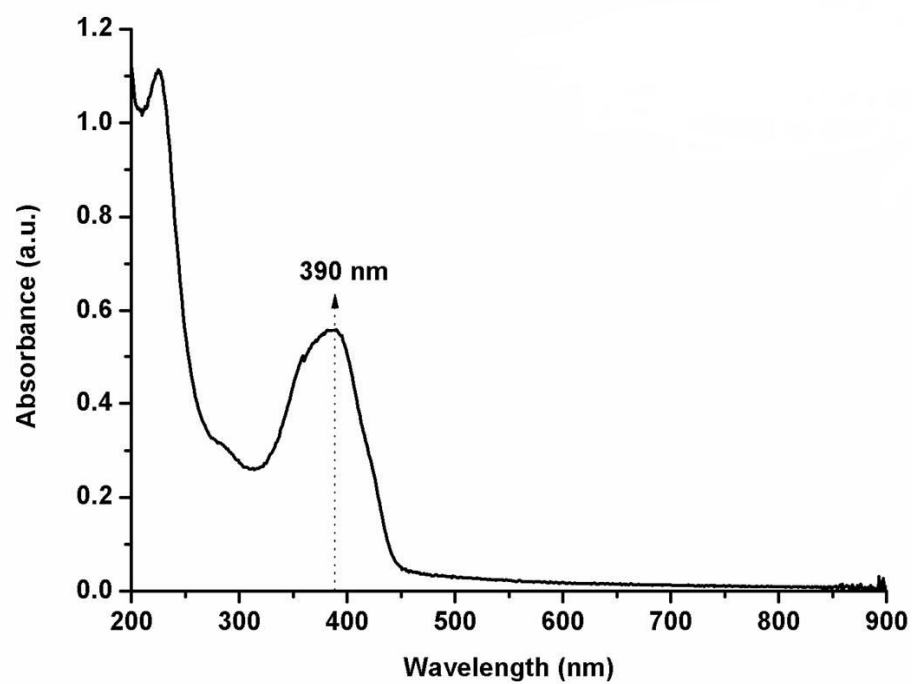

Figure S2. absorption spectrum of as-synthesized AuNC@MHA.

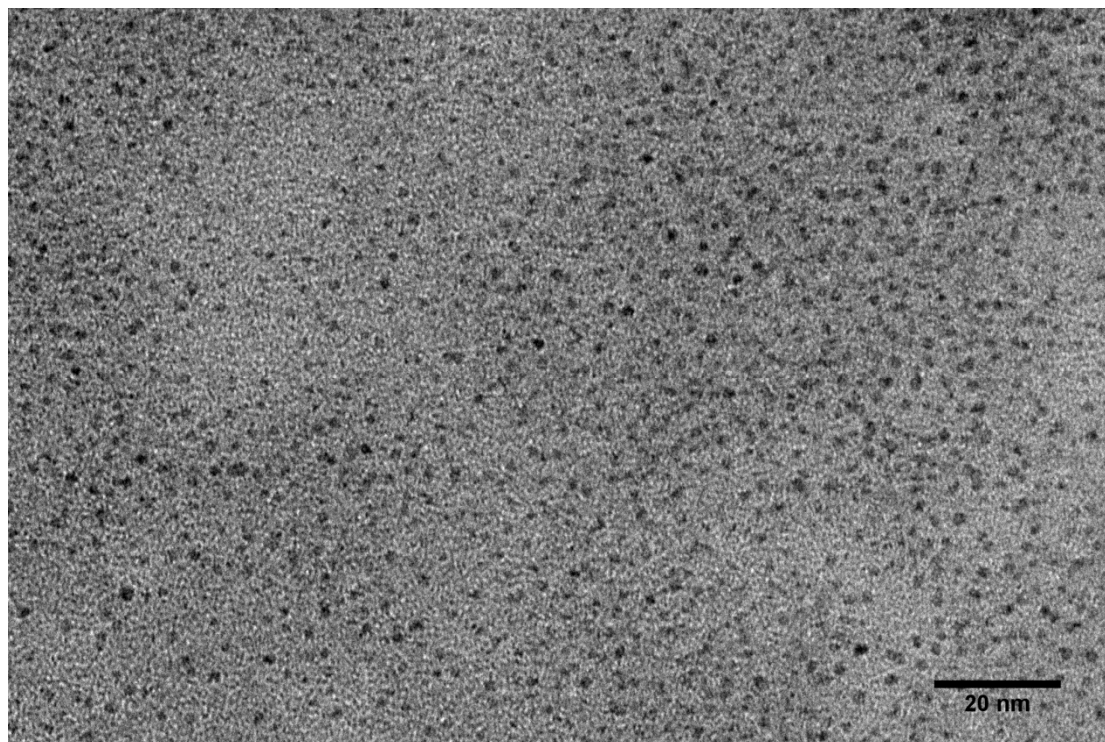

**Figure S3.** TEM image of as-synthesized AuNC@MHA.

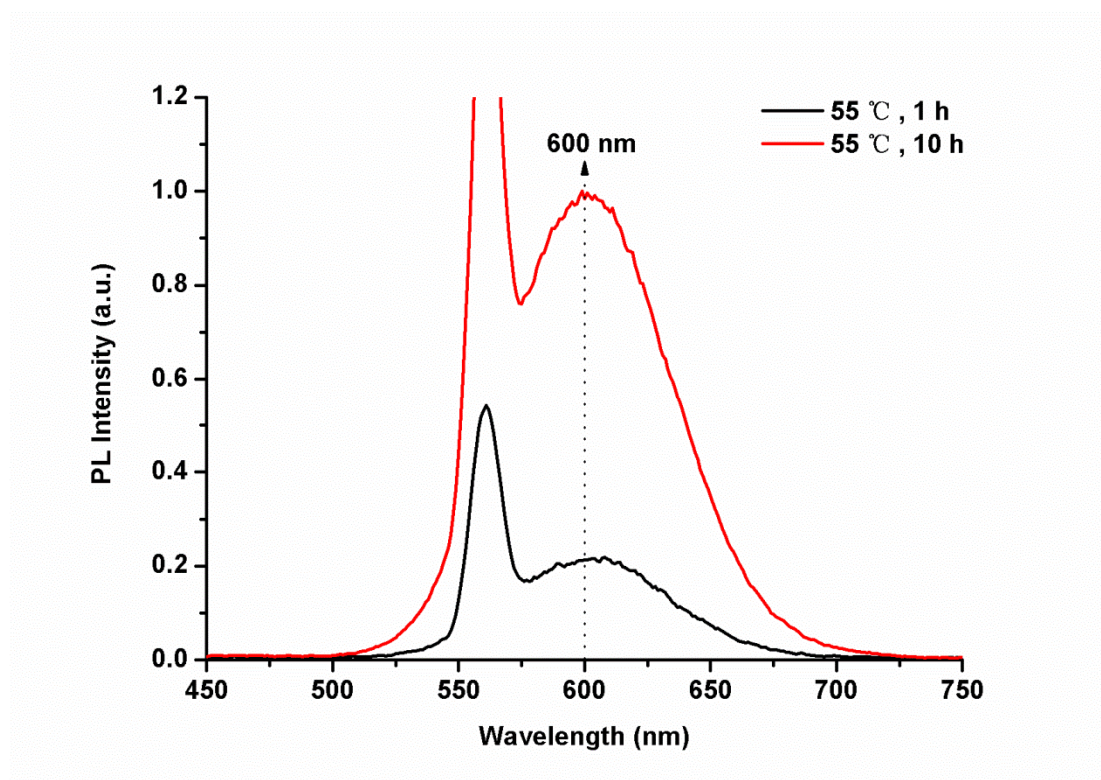

**Figure S4.** PL variations of AuNC@MHA<sub>im</sub>, the sharp peak at 560 nm was from the scattering of the light source.

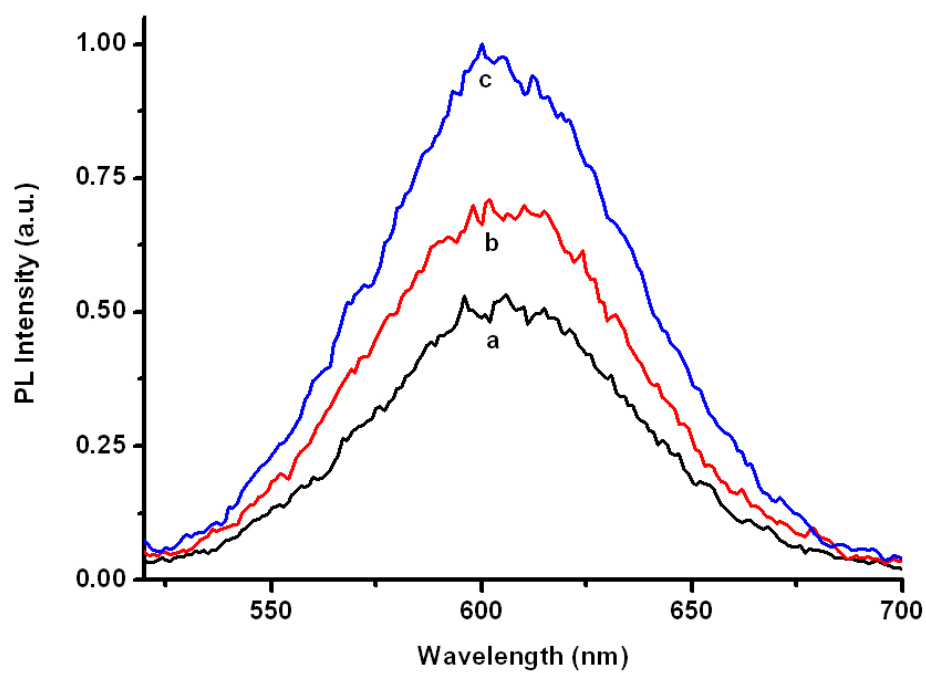

Figure S5 PL intensities under different solvents according to Table S1.

**Table S1.** AuNC@MUA solution dispersed in water, methanol and ethanol.

| Unit ( $\mu\text{L}$ ) | a   | b   | c   |
|------------------------|-----|-----|-----|
| AuNC@MUA               | 100 | 100 | 100 |
| Methanol               | 0   | 0   | 500 |
| Ethanol                | 0   | 500 | 0   |
| Ultrapure water        | 900 | 400 | 400 |

**Table S2** Recalculated volume and concentration of methanol according to the methanol and ethanol reagents used in this study.

| Unit ( $\mu\text{L}$ )            | A      | B      | C      | D      | E      | F      | G      |
|-----------------------------------|--------|--------|--------|--------|--------|--------|--------|
| AuNC@MUA                          | 500    | 500    | 500    | 500    | 500    | 500    | 500    |
| Methanol                          | 2      | 5      | 20     | 50     | 100    | 200    | 300    |
| Ethanol                           | 498    | 495    | 480    | 450    | 400    | 300    | 200    |
| Total volume of methanol          | 2.24   | 5.22   | 20.14  | 49.98  | 99.70  | 199.15 | 298.60 |
| Concentration of ethanol (% v/v)  | 49.776 | 49.478 | 47.986 | 45.002 | 40.030 | 30.085 | 20.140 |
| Concentration of methanol (% v/v) | 0.224  | 0.522  | 2.014  | 4.998  | 9.970  | 19.915 | 29.860 |

**Table S3** The PL integral area, the average value, and standard deviation under different concentrations of methanol measure three times.

| Concentration of methanol (% v/v) | 0.224    | 0.522    | 2.014    | 4.998    | 9.970    | 19.915   | 29.860   |
|-----------------------------------|----------|----------|----------|----------|----------|----------|----------|
| PL integral area 1                | 29176.75 | 29903.28 | 30616.88 | 30905.03 | 33413.48 | 38622.26 | 44569.67 |
| PL integral area 2                | 29735.00 | 30071.32 | 30258.05 | 32017.42 | 33998.03 | 39129.52 | 43932.59 |
| PL integral area 3                | 29813.75 | 30452.69 | 30047.84 | 32069.56 | 33987.74 | 38923.12 | 44481.75 |
| Average value                     | 29575.50 | 30142.43 | 30307.59 | 31664.01 | 33799.75 | 38891.63 | 44328.00 |
| Standard deviation                | 283.74   | 229.86   | 234.94   | 537.10   | 273.17   | 208.28   | 281.89   |
